# Supplementary material for: Recovery of Waste Polyurethane from E-Waste—Part I: Investigation of the Oil Sorption Potential
Source: MDPI journal article supplement (doi:10.3390/ma14216230), 2021-10-20
Supplement: s1 [file s1]

## Supplementary Material

**Table S1.** Results of waste PUF characterization. Values expressed as average of 5 replicates.

| parameter                       | measure unit        | value    | standard deviation |
|---------------------------------|---------------------|----------|--------------------|
| Identification of the substance | dust/granular/loose |          |                    |
| Speed of combustion test        | s                   | 42.73    | 1.26               |
| Outcome of the test             | easily flammable    |          |                    |
| LHV                             | kJ/kg               | 26900.00 | 2051.34            |
| Dry substance                   | %                   | 100.00   | 0                  |
| Ashes at 550 °C                 | % dry substance     | 10.40    | 1.60               |
| pH in water                     | pH units            | 8.02     | 0.16               |
| Density                         | kg/dm <sup>3</sup>  | 0.05     | 0.01               |
| Total Carbon                    | %                   | 65.12    | 3.12               |
| Ammonia                         | mg/kg               | < 2.5    | -                  |
| Aluminum                        | mg/kg               | 6537.60  | 3614.21            |
| Antimony                        | mg/kg               | 179.60   | 326.33             |
| Arsenic                         | mg/kg               | < 10     | -                  |
| Berillium                       | mg/kg               | < 10     | -                  |
| Barium                          | mg/kg               | 152.00   | 28.20              |
| Boron                           | mg/kg               | < 10     |                    |
| Cadmium                         | mg/kg               | < 10     | -                  |
| Cobalt                          | mg/kg               | < 10     | -                  |
| total Chromium                  | mg/kg               | 39.00    | 12.52              |
| Iron                            | mg/kg               | 3182.20  | 670.11             |
| Phosphorus                      | mg/kg               | 106.80   | 22.11              |
| Manganese                       | mg/kg               | 22.20    | 4.71               |
| Mercury                         | mg/kg               | < 0.1    | -                  |
| Molibdenum                      | mg/kg               | < 10     | -                  |

|                                |       |         |         |
|--------------------------------|-------|---------|---------|
| Nickel                         | mg/kg | 12.25   | 4.91    |
| Lead                           | mg/kg | 43.00   | 35.42   |
| Copper                         | mg/kg | 385.80  | 346.12  |
| Selenium                       | mg/kg | < 10    | -       |
| Tin                            | mg/kg | 12.00   | 1.87    |
| Tallium                        | mg/kg | < 10    | 1.87    |
| Tellurium                      | mg/kg | < 10    | -       |
| Vanadum                        | mg/kg | < 10    | -       |
| Zinc                           | mg/kg | 2284.80 | 668.46  |
| Calcium                        | mg/kg | 6616.00 | 1985.44 |
| Magnesium                      | mg/kg | 334.20  | 228.54  |
| Potassium                      | mg/kg | 552.20  | 115.76  |
| Sodium                         | mg/kg | 196.00  | 30.59   |
| Benzo(a)anthracene             | mg/kg | < 0.1   | -       |
| Benzo(a)pyrene                 | mg/kg | < 0.1   | -       |
| Benzo(e)pyrene                 | mg/kg | < 0.1   | -       |
| Benzo(b)fluoranthene           | mg/kg | < 0.1   | -       |
| Benzo(k)fluoranthene           | mg/kg | < 0.1   | -       |
| Benzo(j)fluoranthene           | mg/kg | < 0.1   | -       |
| Benzo(g,h,i)perylene           | mg/kg | < 0.1   | -       |
| sum Benzo(b, j, k)fluoranthene | mg/kg | < 0.1   | -       |
| Crysene                        | mg/kg | < 0.1   | -       |
| Dibenzo(a,e)pyrene             | mg/kg | < 0.1   | -       |
| Dibenzo(a,l)pyrene             | mg/kg | < 0.1   | -       |
| Dibenzo(a,i)pyrene             | mg/kg | < 0.1   | -       |
| Dibenzo(a,h)pyrene             | mg/kg | < 0.1   | -       |
| Dibenzo(a,h)anthracene         | mg/kg | < 0.1   | -       |
| Indeno(1,2,3-c,d)pyrene        | mg/kg | < 0.1   | -       |
| Pyrene                         | mg/kg | < 0.1   | -       |

|                                                       |       |       |      |
|-------------------------------------------------------|-------|-------|------|
| Sum of polycyclic aromatic                            | mg/kg | < 0.1 | -    |
| Cumene<br>(isopropylbenzene)                          | mg/kg | < 0.2 | -    |
| Dipenthene                                            | mg/kg | < 0.2 | -    |
| Naftalene                                             | mg/kg | < 0.1 | -    |
| Anthracene                                            | mg/kg | < 0.1 | -    |
| Fluoranthene                                          | mg/kg | < 0.1 | -    |
| Acenaftilene                                          | mg/kg | < 0.1 | -    |
| Acenaftthene                                          | mg/kg | < 0.1 | -    |
| Fluorene                                              | mg/kg | < 0.1 | -    |
| Fenanthrene                                           | mg/kg | < 0.1 | -    |
| Benzene                                               | mg/kg | < 0.1 | -    |
| 1.3 Butadiene                                         | mg/kg | < 0.1 | -    |
| Etilbenzene                                           | mg/kg | < 0.1 | -    |
| Styrene                                               | mg/kg | 1.77  | 0.76 |
| Toluene                                               | mg/kg | 0.18  | 0.36 |
| m,p-xylene                                            | mg/kg | < 0.1 | -    |
| o-xylene                                              | mg/kg | < 0.1 | -    |
| sum o.m.p-xylene                                      | mg/kg | < 0.1 | -    |
| Sum of aromatic organic compounds (excluding Benzene) | mg/kg | 1.95  | 1.04 |
| Chloromethane                                         | mg/kg | < 0.1 | -    |
| Dichloromethane                                       | mg/kg | < 0.1 | -    |
| Trichloromethane                                      | mg/kg | < 0.1 | -    |
| Vinyl chloride                                        | mg/kg | < 0.1 | -    |
| 1.2-dichloroethane                                    | mg/kg | < 0.1 | -    |
| Trichloroethylene                                     | mg/kg | < 0.1 | -    |
| Tetrachloroethylene                                   | mg/kg | < 0.1 | -    |
| 1.1-dichloroethane                                    | mg/kg | < 0.1 | -    |
| cis 1.2-dichloroethylene                              | mg/kg | < 0.1 | -    |

|                                           |       |       |   |
|-------------------------------------------|-------|-------|---|
| trans 1,2-dichloroethylene                | mg/kg | < 0.1 | - |
| sommatoria cis-trans 1,2-dichloroethylene | mg/kg | < 0.1 | - |
| 1,1,1-trichloroethane                     | mg/kg | < 0.1 | - |
| 1,2-dichloropropane                       | mg/kg | < 0.1 | - |
| 1,1,2-trichloroethane                     | mg/kg | < 0.1 | - |
| 1,2,3 Trichloropropane                    | mg/kg | < 0.1 | - |
| 1,1,1,2 tetrachloroethane                 | mg/kg | < 0.1 | - |
| Tribromomethane                           | mg/kg | < 0.1 | - |
| 1,2-dibromoethane                         | mg/kg | < 0.1 | - |
| Dibromochloromethane                      | mg/kg | < 0.1 | - |
| Bromodichloromethane                      | mg/kg | < 0.1 | - |
| Esachlorobutadiene                        | mg/kg | < 1   | - |
| 1,2-dichlorobenzene                       | mg/kg | < 0.1 | - |
| 1,4-dichlorobenzene                       | mg/kg | < 0.1 | - |
| 1,2,4-trichlorobenzene                    | mg/kg | < 0.1 | - |
| 1,2,4,5-tetrachlorobenzene                | mg/kg | < 0.1 | - |
| Esachlorobenzene                          | mg/kg | < 0.1 | - |
| Pentachlorobenzene                        | mg/kg | < 0.1 | - |
| Pentachlorobenzene                        | mg/kg | < 0.1 | - |
| Alaclor                                   | mg/kg | < 0.1 | - |
| Aldrin                                    | mg/kg | < 0.1 | - |
| alfa-esachlorocycloesane                  | mg/kg | < 0.1 | - |
| beta-esachlorocycloesane                  | mg/kg | < 0.1 | - |
| cis-chlordane                             | mg/kg | < 0.1 | - |
| gamma-esaclorocicloesano (lindane)        | mg/kg | < 0.1 | - |
| Clordecone                                | mg/kg | < 0.1 | - |
| Mirex                                     | mg/kg | < 0.1 | - |
| Toxafene                                  | mg/kg | < 0.1 | - |

|                                 |       |        |         |
|---------------------------------|-------|--------|---------|
| DDD                             | mg/kg | < 0.1  | -       |
| DDE                             | mg/kg | < 0.1  | -       |
| DDT                             | mg/kg | < 0.1  | -       |
| Dieldrin                        | mg/Kg | < 0.1  | -       |
| Endrin                          | mg/kg | < 0.1  | -       |
| Demeton                         | mg/kg | < 0.1  | -       |
| Diazinon                        | mg/kg | < 0.1  | -       |
| Disulfoton                      | mg/kg | < 0.1  | -       |
| Ethion                          | mg/kg | < 0.1  | -       |
| Guthion                         | mg/kg | < 0.1  | -       |
| Malathion                       | mg/kg | < 0.1  | -       |
| Parathion ethyl                 | mg/kg | < 0.1  | -       |
| Parathion methyl                | mg/kg | < 0.1  | -       |
| Aliphatic hydrocarbons<br>C5-C8 | mg/kg | 1.24   | 0.78    |
| Hydrocarbons C10-C40            | mg/kg | 1568.4 | 1415.76 |
| Eptachlor epoxyde               | mg/kg | < 0.1  | -       |
| Endosulfan sulphate             | mg/kg | < 0.1  | -       |
| Esabromobiphenyl                | mg/kg | < 0.1  | -       |
| "dioxin like" PCBs<br>congeners |       |        |         |
| #77                             | mg/kg | < 1    | -       |
| #81                             | mg/kg | < 1    | -       |
| #105                            | mg/kg | < 1    | -       |
| #114                            | mg/kg | < 1    | -       |
| #118                            | mg/kg | < 1    | -       |
| #123                            | mg/kg | < 1    | -       |
| #126                            | mg/kg | < 1    | -       |
| #156                            | mg/kg | < 1    | -       |
| #157                            | mg/kg | < 1    | -       |

|                                                         |          |         |                                                            |
|---------------------------------------------------------|----------|---------|------------------------------------------------------------|
| #167                                                    | mg/kg    | < 1     | -                                                          |
| #169                                                    | mg/kg    | < 1     | -                                                          |
| #189                                                    | mg/kg    | < 1     | -                                                          |
| PCBs congeners                                          |          |         |                                                            |
| #28                                                     | mg/kg    | < 1     | -                                                          |
| #52                                                     | mg/kg    | < 1     | -                                                          |
| #95                                                     | mg/kg    | < 1     | -                                                          |
| #99                                                     | mg/kg    | < 1     | -                                                          |
| #110                                                    | mg/kg    | < 1     | -                                                          |
| #101                                                    | mg/kg    | < 1     | -                                                          |
| #128                                                    | mg/kg    | < 1     | -                                                          |
| #138                                                    | mg/kg    | < 1     | -                                                          |
| #146                                                    | mg/kg    | < 1     | -                                                          |
| #149                                                    | mg/kg    | < 1     | -                                                          |
| #170                                                    | mg/kg    | < 1     | -                                                          |
| #151                                                    | mg/kg    | < 1     | -                                                          |
| #153                                                    | mg/kg    | < 1     | -                                                          |
| #177                                                    | mg/kg    | < 1     | -                                                          |
| #183                                                    | mg/kg    | < 1     | -                                                          |
| #180                                                    | mg/kg    | < 1     | -                                                          |
| #187                                                    | mg/kg    | < 1     | -                                                          |
| <b>Results of the leaching test UNI EN 12457-2:2004</b> |          |         | <b>Limits for the recovery of non hazardous waste [33]</b> |
| pH                                                      | pH units | 8.52    | 5.5-12                                                     |
| Conductivity                                            | µS/cm    | 282.60  | 314.41 -                                                   |
| Antimony                                                | mg/l     | 0.01    | 0.01 -                                                     |
| Arsenic                                                 | mg/l     | < 0.03  | - 0.05                                                     |
| Barium                                                  | mg/l     | 0.18    | 0.02 1                                                     |
| Cadmium                                                 | mg/l     | < 0.002 | - 0.005                                                    |

|                                                   |        |          |        |       |
|---------------------------------------------------|--------|----------|--------|-------|
| Total Chromium                                    | mg/l   | 0.06     | 0.03   | 50    |
| Mercury                                           | mg/l   | < 0.0012 | -      | 0.001 |
| Molibdenum                                        | mg/l   | < 0.06   | -      | -     |
| Nickel                                            | mg/l   | < 0.06   | -      | 0.01  |
| Lead                                              | mg/l   | 0.04     | 0.04   | 0.05  |
| Copper                                            | mg/l   | 0.14     | 0.01   | 0.05  |
| Boron                                             | mg/l   | 0.10     | 0.01   | -     |
| Selenium                                          | mg/l   | < 0.002  | -      | 0.010 |
| Zinc                                              | mg/l   | 0.75     | 0.24   | 3     |
| Dissolved Organic Carbon (DOC)                    | mg/l   | 27.20    | 29.84  | 30    |
| Fluoride                                          | mg/l   | 55.00    | -      | 1.5   |
| Chlorides                                         | mg/l   | 37.66    | 57.18  | 100   |
| Sulphates                                         | mg/l   | 13.84    | 13.06  | 250   |
| TDS (total dissolved solids)                      | mg/l   | 232.00   | 191.56 | -     |
| Halogenated organic compounds measurd as Chlorine | % t.q. | 0.77     | 0.24   | -     |
| Total Fluorine                                    | % t.q. | 0.04     | -      | -     |
| Total Chlorine                                    | % t.q. | 0.94     | 0.28   | -     |
| Total Bromine                                     | % t.q. | 0.04     | 0.03   | -     |
| Total Iodine                                      | % t.q. | 0.01     | -      | -     |
| Total Sulphur                                     | mg/kg  | 123.00   | 25.98  | -     |
